# Supplementary material
Source: PubMed Central journal article supplement (PMC3092339)
Supplement: legends.pdf [file legends.pdf]

**Supplement File 1:** Gene probes flagged “present” after rhGH administration.

Raw microarray data were exported to and analyzed on GeneSpring GX 9. Signal data was q-spline normalized and filtered based on criteria that flags for each gene be present in all subjects in at least 1 time point. The gene list (4-day study) was compared to the list from the first 24 hrs of the study. The 681 genes in this list are the unique probes present after the first 24 hrs of the study and the normalized expression data.

**Supplement File 2:** rhGH\_time gene list. Genes whose expressions were significantly changed by rhGH administration across the 96-hour study.

From the genes that were flagged “present” in the 139 microarrays, RMANOVA was performed to identify genes that were significantly changed. The resulting gene list was subsequently re-analyzed by RMANOVA to determine genes that changed  $\geq 1.5$  fold from baseline in at least 2 time points. This list has 1224 gene probes and the fold-change values compared to the first sample taken at -24hrs.
